# Supplementary material
Source: PubMed Central journal article supplement (PMC4104516)
Supplement: NIHMS587638-supplement-supplement_1.pdf [file NIHMS587638-supplement-supplement_1.pdf]

Supplemental Table 1: Fecundability according to smoking intensity and time since cessation in 3,087 women: The Smart Gravid Cohort, Denmark, 2007-2011.

|                 | Pregnancies | Cycles | Model 1<br>FR (95% CI) <sup>a</sup> | Model 2<br>FR (95% CI) <sup>b</sup> |
|-----------------|-------------|--------|-------------------------------------|-------------------------------------|
| Quit 1 year:    |             |        |                                     |                                     |
| 1 - 4           | 20          | 155    | 0.79 (0.52-1.19)                    | 0.87 (0.58-1.31)                    |
| 5 - 9           | 19          | 145    | 0.82 (0.54-1.24)                    | 0.80 (0.53-1.21)                    |
| 10 - 19         | 37          | 209    | 1.03 (0.77-1.39)                    | 1.08 (0.80-1.45)                    |
| ≥ 20            | 15          | 82     | 1.22 (0.78-1.92)                    | 1.20 (0.76-1.90)                    |
| Quit ≥ 2 years: |             |        |                                     |                                     |
| 1 - 4           | 106         | 709    | 0.91 (0.76-1.09)                    | 0.91 (0.76-1.09)                    |
| 5 - 9           | 138         | 653    | 1.19 (1.01-1.39)                    | 1.16 (0.99-1.36)                    |
| 10 - 19         | 141         | 845    | 1.02 (0.88-1.20)                    | 0.99 (0.84-1.16)                    |
| ≥ 20            | 35          | 267    | 0.81 (0.60-1.11)                    | 0.78 (0.57-1.07)                    |

FR= fecundability ratio; CI = confidence interval.

<sup>a</sup> Model 1 FR and 95% CI are adjusted for cycle number at risk.

<sup>b</sup> Model 2 FR and 95% CI are adjusted for cycle number at risk, age, partner smoking, and passive smoking.

Supplemental Table 2. Baseline characteristics of 2,346 women with no history of active smoking by lifetime exposure to passive smoking: The Smart Gravid Cohort, Denmark, 2007 – 2011.<sup>a</sup>

|                                                          | None | Early life<br>only | Adolescence<br>only | Adulthood<br>only | Early life<br>and<br>adolescence | Early life<br>and<br>adulthood | Adolescence<br>and<br>adulthood | Exposed<br>at all<br>stages |
|----------------------------------------------------------|------|--------------------|---------------------|-------------------|----------------------------------|--------------------------------|---------------------------------|-----------------------------|
| Number of women                                          | 591  | 295                | 59                  | 109               | 858                              | 34                             | 59                              | 341                         |
| Participant's age, years (mean)                          | 28.0 | 28.3               | 28.5                | 27.9              | 29.1                             | 27.9                           | 27.5                            | 27.2                        |
| Male Partner's age, years (mean)                         | 30.8 | 30.5               | 30.9                | 31.1              | 30.6                             | 31.4                           | 30.7                            | 30.6                        |
| Partner is a current, regular smoker (%)                 | 4    | 6                  | 1                   | 23                | 6                                | 38                             | 28                              | 31                          |
| Passive smoking in adulthood $\geq$ 3 hrs/day (%)        | 0    | 0                  | 0                   | 18                | 0                                | 8                              | 27                              | 23                          |
| Participant's mother smoked while pregnant (%)           | 0    | 35                 | 0                   | 0                 | 56                               | 18                             | 0                               | 61                          |
| Intercourse frequency $\geq$ 4/week (%)                  | 17   | 19                 | 12                  | 21                | 19                               | 12                             | 16                              | 20                          |
| Doing something to time intercourse (%)                  | 46   | 45                 | 45                  | 44                | 48                               | 34                             | 41                              | 44                          |
| Body mass index of participant, kg/m <sup>2</sup> (mean) | 23.2 | 23.6               | 23.0                | 23.1              | 24.5                             | 26.2                           | 23.5                            | 25.1                        |
| Body mass index of partner, kg/m <sup>2</sup> (mean)     | 24.9 | 25.1               | 24.7                | 25.2              | 25.4                             | 25.8                           | 25.0                            | 25.7                        |
| Last contraceptive: hormonal <sup>b</sup> (%)            | 59   | 58                 | 63                  | 62                | 64                               | 78                             | 66                              | 69                          |

<sup>a</sup>All characteristics except age are age-standardized to the distribution of the cohort at baseline.

<sup>b</sup> Includes oral contraceptive pills and other hormonal contraceptives such as patch and injection.

*Supplemental Table 2 continued on next page...*

Supplemental Table 2, continued...

|                                                   | None | Early life<br>only | Adolescence<br>only | Adulthood<br>only | Early life<br>and<br>adolescence | Early life<br>and<br>adulthood | Adolescence<br>and<br>adulthood | Exposed<br>at all<br>stages |
|---------------------------------------------------|------|--------------------|---------------------|-------------------|----------------------------------|--------------------------------|---------------------------------|-----------------------------|
| Last contraceptive: combination hormonal (%)      | 59   | 58                 | 63                  | 62                | 64                               | 78                             | 66                              | 69                          |
| History of infertility (%)                        | 8    | 7                  | 10                  | 10                | 8                                | 2                              | 3                               | 10                          |
| Parous (%)                                        | 27   | 31                 | 30                  | 23                | 35                               | 28                             | 25                              | 31                          |
| Ever pregnant (%)                                 | 35   | 38                 | 36                  | 36                | 44                               | 37                             | 35                              | 45                          |
| Regular cycles (%)                                | 75   | 77                 | 81                  | 78                | 74                               | 78                             | 80                              | 75                          |
| No vocational training or higher education (%)    | 10   | 8                  | 10                  | 10                | 10                               | 14                             | 10                              | 13                          |
| Household income <25,000 Danish Kroner/year (%)   | 13   | 13                 | 15                  | 14                | 13                               | 16                             | 22                              | 14                          |
| Participant exposure to environmental hazards (%) | 14   | 14                 | 16                  | 18                | 18                               | 16                             | 19                              | 22                          |
| Partner exposure to environmental hazards (%)     | 15   | 18                 | 27                  | 23                | 24                               | 28                             | 37                              | 30                          |
| Caffeine intake, mg/day (mean)                    | 99.4 | 109                | 114                 | 112               | 111                              | 90.3                           | 102                             | 115                         |
| Consumes $\geq 7$ alcoholic beverages/week (%)    | 6    | 7                  | 15                  | 9                 | 8                                | 10                             | 7                               | 9                           |
